# Supplementary material for: A multiple-coordination framework for CsPbI2Br perovskite solar cells
Source: Royal Society of Chemistry journal article supplement (doi:10.1039/d3tc03092j), 2024-01-01
Supplement: d3tc03092j1.pdf [file d3tc03092j1.pdf]

Supplementary Information for

## **A multiple-coordination framework for CsPbI<sub>2</sub>Br perovskite solar cells**

Jincheng Huang<sup>a,b,§</sup>, Dingjian Zhou<sup>a,§</sup>, Huibo Yan<sup>a</sup>, Chunfeng Meng<sup>c</sup>, Yuzhao Yang<sup>d</sup>,

Jun Liu<sup>a</sup>, Ming Wang<sup>a</sup>, Ping Xu<sup>a</sup>, Zhuoyin Peng<sup>b\*</sup>, Jianlin Chen<sup>b</sup>, and Guijun Li<sup>a\*</sup>

<sup>a</sup> *Key Laboratory of Optoelectronic Devices and Systems of Ministry of Education and Guangdong Province, College of Physics and Optoelectronic Engineering, Shenzhen University, Shenzhen 518060, China.*

<sup>b</sup> *College of Energy and Power Engineering, Changsha University of Science and Technology, Changsha 410114, China*

<sup>c</sup> *School of Material Science and Engineering, Jiangsu University of Science and Technology, Zhenjiang, Jiangsu 212003, China.*

<sup>d</sup> *Institute of New Energy Technology, College of Information Science and Technology, Jinan University, Guangzhou 510632, China.*

<sup>§</sup> *These authors contributed equally to this work.*

*\*Corresponding authors.*

E-mail addresses: joeypengzy@outlook.com (Z. Peng), gliad@connect.ust.hk (G.Li)

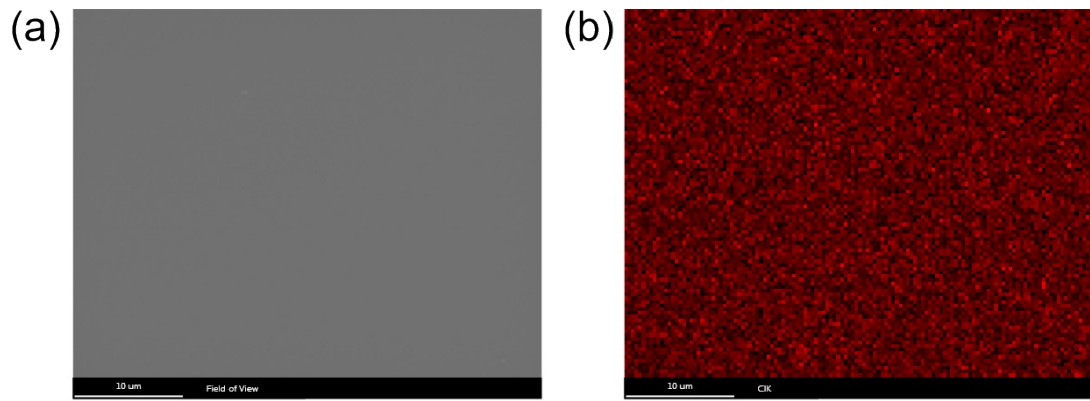

**Fig. S1.** a) The SEM images and b) corresponding energy disperse spectrum image of ETL3.

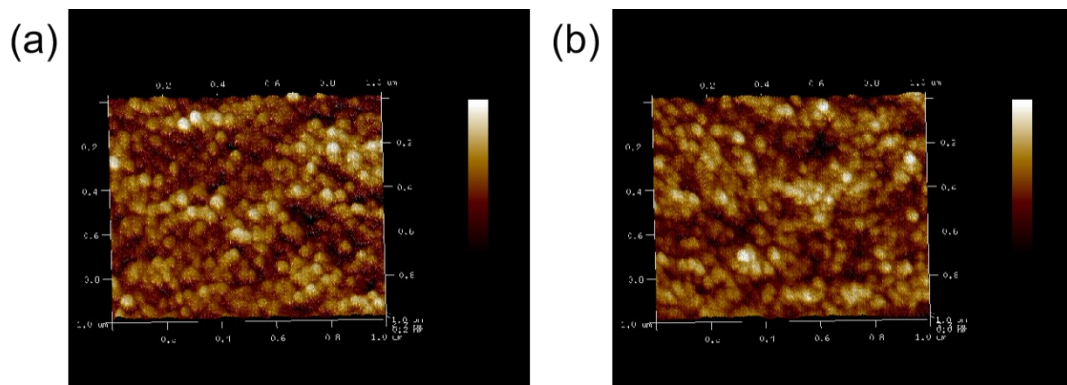

**Fig. S2.** The AFM images of a) ETL0 and b) ETL3.

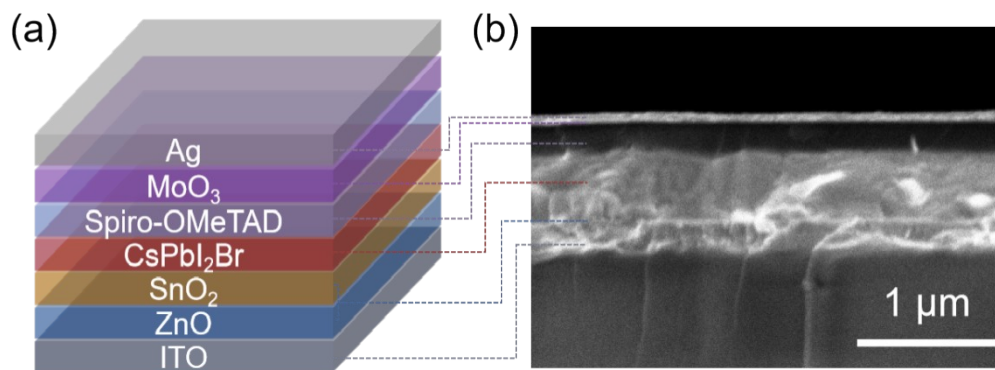

**Fig. S3.** a) The schematic diagram and b) the cross-section image of CsPbI<sub>2</sub>Br PSCs.

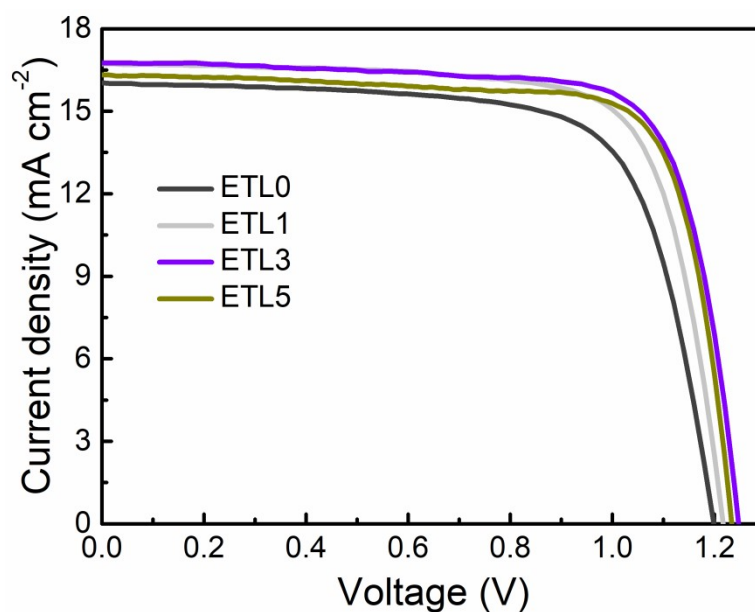

**Fig. S4.** The J-V characteristics of CsPbI<sub>2</sub>Br PSCs based on different ETLs.

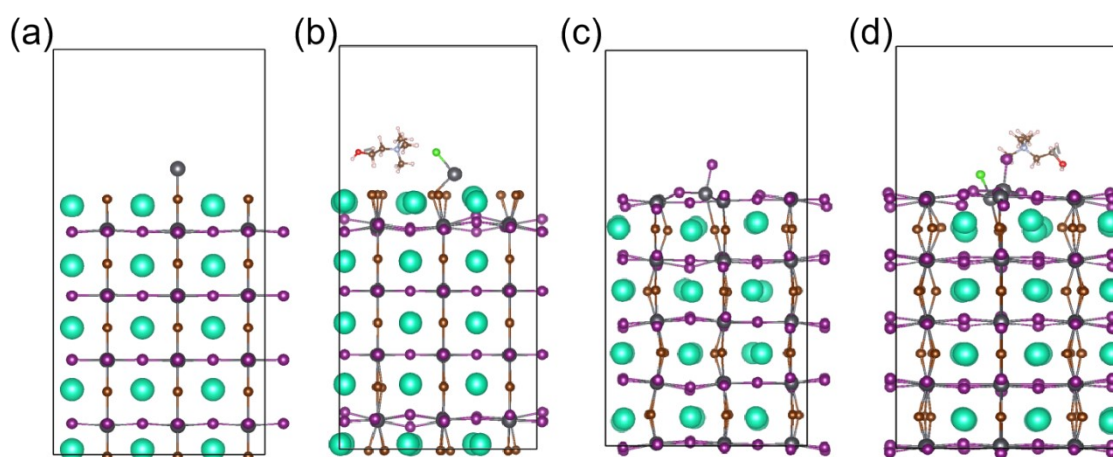

**Fig. S5.** The representative structure models: (a) unpassivated Pb cluster, (b) passivated Pb cluster, (c) unpassivated Pb-I antisite defect, (d) passivated Pb-I antisite defect.

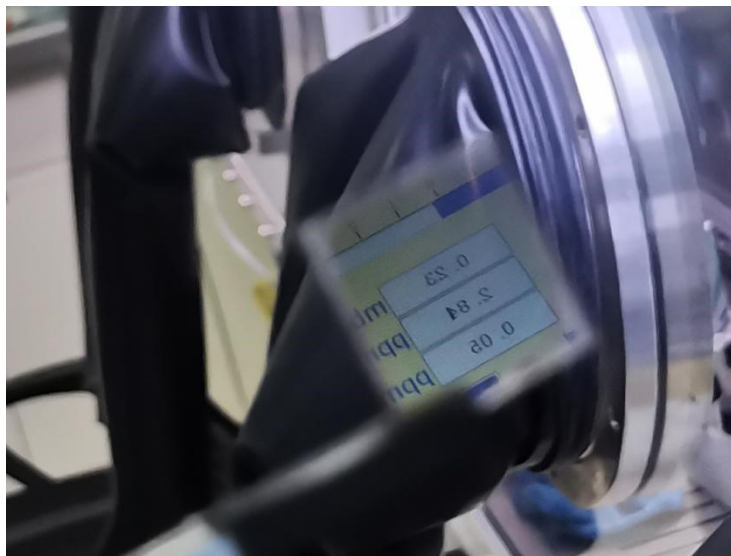

**Fig. S6.** The mirror-like  $\text{CsPbI}_2\text{Br}$  film.

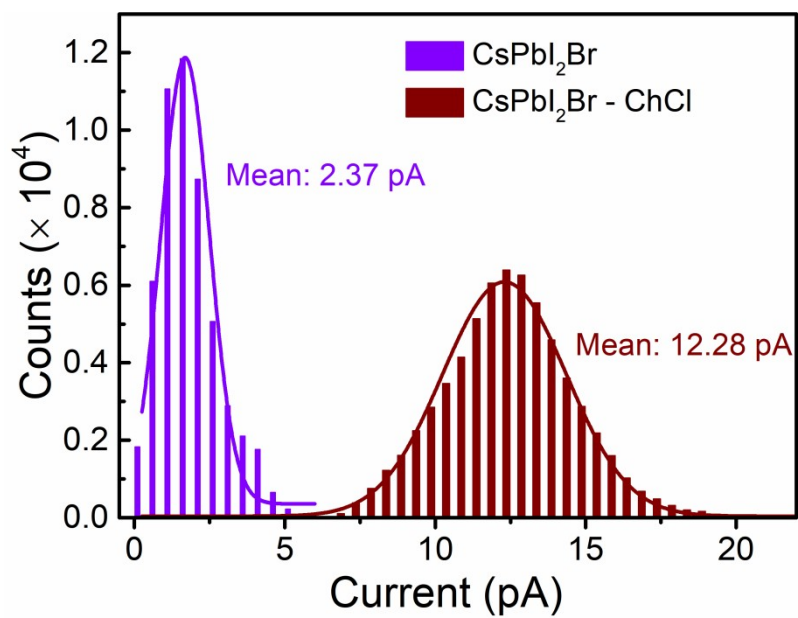

**Fig. S7.** The current distribution of  $\text{CsPbI}_2\text{Br}$  film.

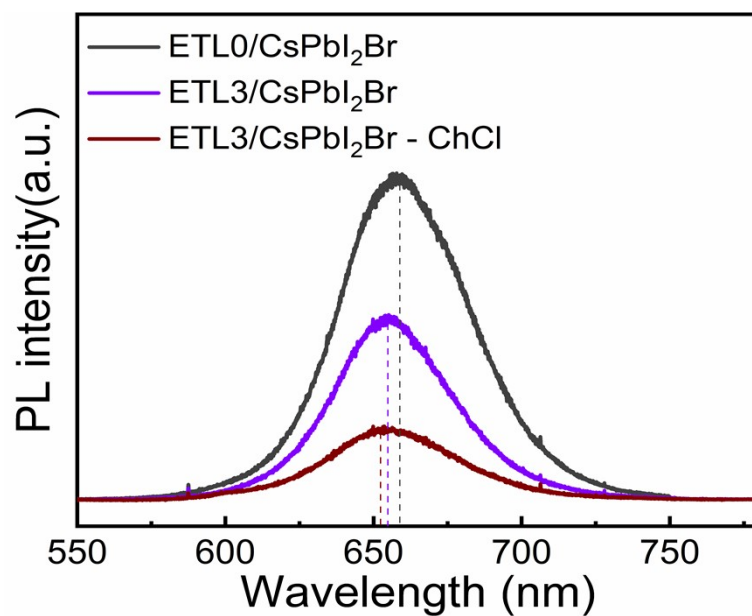

**Fig. S8.** Steady-state photoluminescence (PL) spectrum of CsPbI<sub>2</sub>Br films deposited on ITO/ETL substrate, the excitation light incidents from the ITO side.

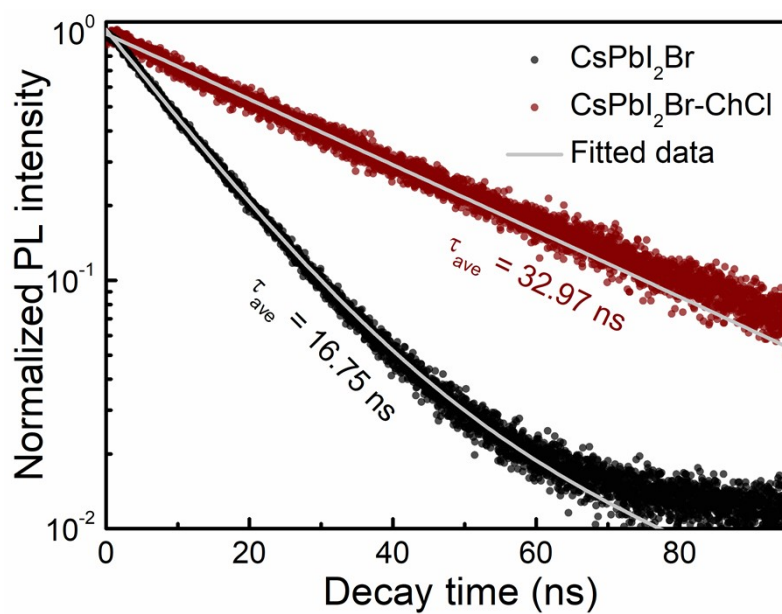

**Fig. S9.** Normalized TRPL decay profiles.

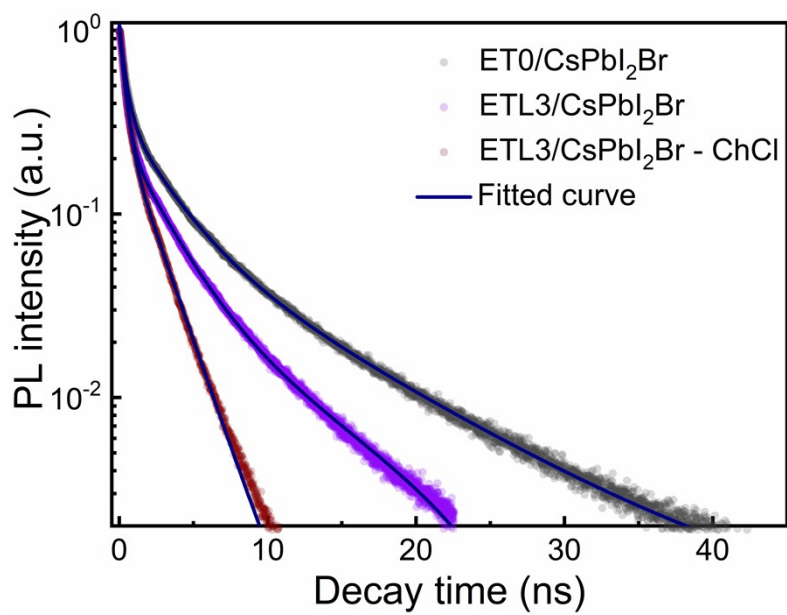

**Fig. S10.** The TRPL decay curves derived from FLIM.

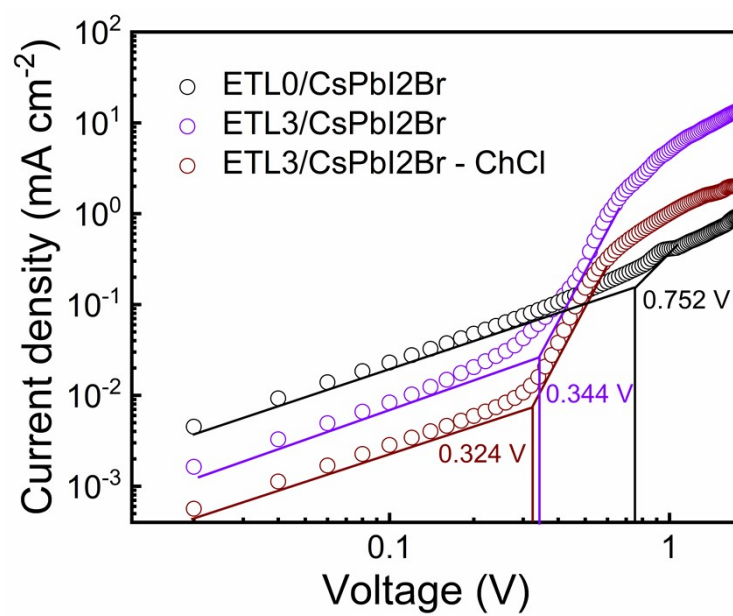

**Fig. S11.** SCLC measurements of hole-only devices.

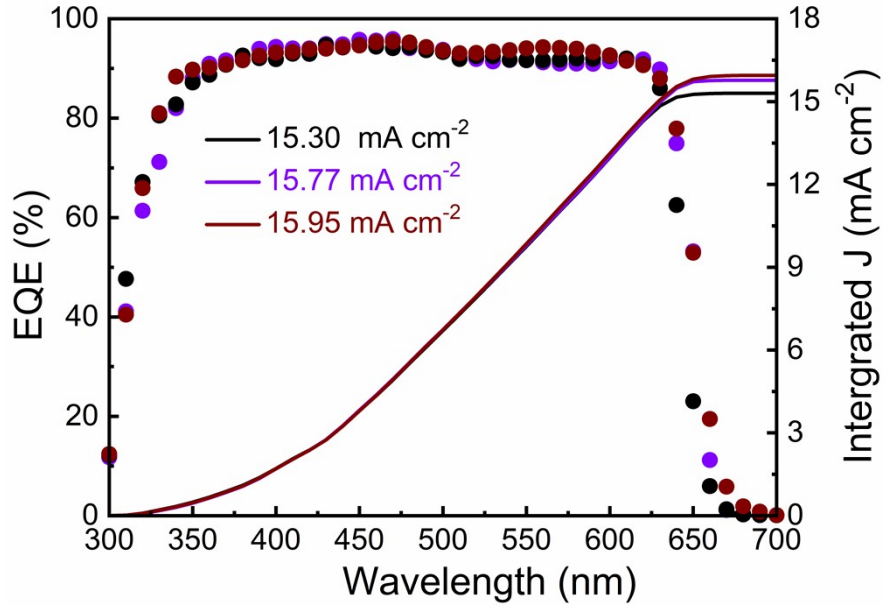

**Fig. S12.** EQE spectra of ETL3/CsPbI<sub>2</sub>Br-ChCl PSCs.

**Table S1.** Fitting results of the TRPL spectra.

| PSCs      | $A_1$ | $\tau_1$ (ns) | $A_2$ | $\tau_2$ (ns) | $\tau_{ave}$ (ns) |
|-----------|-------|---------------|-------|---------------|-------------------|
| ETL0      | 0.142 | 2.974         | 0.863 | 7.513         | 7.236             |
| ETL3      | 0.263 | 1.423         | 0.749 | 3.898         | 3.617             |
| ETL3-ChCl | 0.192 | 0.758         | 0.816 | 2.322         | 2.210             |
